## Contribution to the Themed Section: ‘*Marine aquaculture in the Anthropocene*’ Original Article

# Adaption potential of *Crassostrea gigas* to ocean acidification and disease caused by *Vibrio harveyi*

Davide Nordio<sup>1,2</sup>, Natalie Khtikian<sup>1</sup>, Sean Andrews<sup>1</sup>, Daniela Bertotto<sup>2</sup>, Karen Leask<sup>1</sup>, and Timothy Green <sup>1\*</sup>

<sup>1</sup>Department of Fisheries and Aquaculture, Centre for Shellfish Research, Vancouver Island University, Nanaimo, BC V9R 5S5, Canada

<sup>2</sup>Department of Comparative Biomedicine and Food Sciences, University of Padua, Legnaro, Padua I-35020, Italy

\*Corresponding author: tel: +1 250 753 3245; e-mail: [timothy.green@viu.ca](mailto:timothy.green@viu.ca).

Nordio, D., Khtikian, N., Andrews, S., Bertotto, D., Leask, K., and Green, T. Adaption potential of *Crassostrea gigas* to ocean acidification and disease caused by *Vibrio harveyi*. – ICES Journal of Marine Science, 78: 360–367.

Received 26 December 2019; revised 13 April 2020; accepted 16 April 2020; advance access publication 29 June 2020.

The survival and development of bivalve larvae is adversely impacted by ocean acidification and *Vibrio* infection, indicating that bivalves need to simultaneously adapt to both stressors associated with anthropogenic climate change. In this study, we use a half-dial breeding design to estimate heritability ( $h^2$ ) for survival to *Vibrio harveyi* infection and larval shell length to aragonite undersaturated and normal conditions in laboratory-reared *Crassostrea gigas*. Phenotypic differences were observed between families for these traits with heritability estimated to be moderate for survival to *V. harveyi* challenge ( $h^2 = 0.25$ ) and low for shell length in corrosive ( $\Omega_{\text{aragonite}} = 0.9$ ,  $h^2 = 0.15$ ) and normal conditions ( $\Omega_{\text{aragonite}} = 1.6$ ,  $h^2 = 0.15$ ). Predicted breeding values for larval shell length are correlated between aragonite-undersaturated and normal conditions (Spearman  $r = 0.63$ ,  $p < 0.05$ ), indicating that larger larvae tend to do better in corrosive seawater. Aquaculture hatcheries routinely cull slow-growing larvae to reduce and synchronize time taken for larvae to metamorphose to spat, thus inadvertently applying size-related selection for larger larvae. This indirect selection in the hatchery populations provides a plausible explanation why domesticated oyster populations are less sensitive to ocean acidification.

**Keywords:** aquaculture, *Crassostrea*, genetic selection, ocean acidification, *Vibrio*.

## Introduction

Ocean change is projected to impact all areas of the ocean, from deep sea to coastal estuaries (Feely *et al.*, 2004), with potentially wide-ranging impacts on marine life. A major goal of climate change research is to determine if species can adapt, via evolution or physiological acclimation, to the rapid pace of ocean change (Munday *et al.*, 2013; Ross *et al.*, 2016). The rapidly rising levels of atmospheric CO<sub>2</sub> are not only causing ocean warming but also lowering seawater pH and altering carbonate saturation state of the oceans (Feely *et al.*, 2004; Orr *et al.*, 2005), which is interfering with shell formation in calcifying animals (Barton *et al.*, 2012; Ross *et al.*, 2016). Ocean warming also influences the prevalence and severity of marine infectious diseases (Burge *et al.*, 2014), such as the emergence of *Vibrio* infections in temperate coastal

waters (Le Roux *et al.*, 2016; Vezzulli *et al.*, 2016; Baker-Austin *et al.*, 2017). Most studies investigating the evolutionary potential of marine animals to climate change have focused on a single climate change stressor (Parker *et al.*, 2011; Sunday *et al.*, 2011; Kelly *et al.*, 2013; Malvezzi *et al.*, 2015; Tasoff and Johnson, 2019), although there has been an increasing recognition of the importance of investigating multiple stressors (Foo *et al.*, 2012; Cole *et al.*, 2016; Welch and Munday, 2017). For example, adaption to ocean acidification may result in evolutionary trade-offs with other traits that affect general fitness, such as reproductive output or disease tolerance that constrain adaption potential (reviewed by Kelly and Hofmann, 2013).

Quantitative genetic approaches are increasingly becoming popular in climate change research for measuring narrow-sense

heritability ( $h^2$ ), the proportion of phenotypic variation in a trait that is controlled by additive genetic effects (Kelly and Hofmann, 2013; Sunday *et al.*, 2014). Knowing a trait's heritability is valuable, because highly heritable traits under strong selection evolve rapidly within a few generations, whereas low heritability combined with weak selection results in small or negligible evolutionary change (Morrissey *et al.*, 2010). Quantitative genetic approaches can also be used to determine an individual's genetic merit, or sum of the additive genetic effects of an individual's gene for a given trait, and thus the expected effect of the genes that it passes to its offspring, also referred to as its "breeding value" (Kruuk, 2004). Finally, the magnitude of genetic correlations between two or more traits can also be predicted using quantitative genetics (Kelly and Hofmann, 2013), providing important information on potential trade-offs.

It is widely known that ocean acidification and pathogenic *Vibrio* bacteria have adverse impacts on the development and survival of bivalve larvae (Estes *et al.*, 2004; Elston *et al.*, 2008; Barton *et al.*, 2012). These two stressors have been blamed for failing aquaculture production of the Pacific oyster (*Crassostrea gigas*) in the NE Pacific Ocean (Elston *et al.*, 2008; Barton *et al.*, 2015). Over the coming decades, oceanographic modelling predicts the pH and aragonite saturation of coastal waters of the NE Pacific will shift during spring and summer to levels that cause larval shell abnormalities in *C. gigas* (Evans *et al.*, 2019). *Vibrio* infections of shellfish are also expected to become more frequent with warming coastal waters supporting larger *Vibrio* populations (Le Roux *et al.*, 2016). Determining if *C. gigas* can simultaneously adapt to these two stressors is a key priority. Mass selection for improved growth rate and survival to *Marteilia sydneyi* (QX disease) in the Sydney rock oyster, *Saccostrea glomerata*, has resulted, serendipitously, in reduced effects of ocean acidification on larval shell length (Parker *et al.*, 2011), indicating a potential for a genetic correlation between these traits. Several key studies have estimated narrow-sense heritability for the shell length of bivalve larvae in high  $p\text{CO}_2$  conditions (*Mytilus trossulus*,  $h^2 = 0.09$ ; Sunday *et al.*, 2011), or experimental infection with *Vibrio aestuarianus* (*C. gigas*,  $h^2 = 0.09\text{--}0.30$ ; Azema *et al.*, 2017) and *Vibrio parahaemolyticus* (*Meretrix petechialis*,  $h^2 = 0.31\text{--}0.32$ ; Liang *et al.*, 2017), but these studies did not consider evolutionary trade-offs with other traits. The current study addressed this deficit by using a half-dial breeding design to simultaneously calculate narrow-sense heritability and genetic correlations for ocean acidification (OA) and *Vibrio* resistance in *C. gigas* larvae. This information is crucial to the aquaculture industry as it prepares for climate change. Shellfish farming supports over \$300 million in economic activity in rural communities on the west coast of North America, and *C. gigas* comprises >80% of the industry's total annual shellfish harvest by live weight (Dumbauld *et al.*, 2009).

## Material and methods

### Broodstock collection and conditioning

To maximize genetic diversity in our study, adult diploid *C. gigas* of approximately 2.5 years of age were sourced from three different farms. These adult *C. gigas* were originally purchased by oyster farmers in British Columbia from aquaculture hatcheries in Chile, United States, or collected as wild spat from Pendrell Sound, British Columbia, Canada. Oysters were collected during winter (February 2019) and transported to Vancouver Island

University's Deep Bay Marine Field Station, where *C. gigas* were transferred to a 120-l conditioning tank and maintained under continuously flowing seawater. Seawater temperature was gradually increased to 21°C during 6 weeks period, and *C. gigas* were fed a combined algal diet of *Chaetoceros muelleri*, *Isochrysis galbana*, and *Pavlova lutheri*. The reason for collecting broodstock in winter and undertaking reproductive conditioning in a common environment was to minimize paternal effects between broodstock on offspring quality (Parker *et al.*, 2012).

### Seawater collection

The North Salish Sea is an ocean acidification hot spot, and deep-water corrosive conditions ( $\Omega_{\text{aragonite}} < 1$ ) persist for the entire year (Evans *et al.*, 2019). We exploited a natural depth profile of aragonite saturation for our ocean acidification challenge by using Niskin bottles to collect seawater at 5 and 70 m at Baynes Sound Sampling Station 17 (49.474 N, 124.758 W). We chose to collect seawater with naturally high concentration of  $p\text{CO}_2$  for the ocean acidification challenge (Ocean acidification challenge section) to ensure that other variables, such as low  $p\text{O}_2$  and microbial community, are representative of aragonite undersaturated conditions experienced in Western Canada (Reum *et al.*, 2016). Niskin bottle target depth was determined using an electronic wire counter (A.G.O. Environmental Ltd), and messengers were used to trip Niskin bottles. Seawater for chemical analysis was collected from each depth in duplicate 350-ml amber soda-lime glass bottles, poisoned with 200  $\mu\text{l}$  of saturated  $\text{HgCl}_2$ , and crimp sealed using polyurethane-lined metal caps. Seawater for OA challenge was collected in triplicate 1-l amber soda-lime glass bottle. Sample bottles were rinsed three times prior to filling with sample and filled from the bottom to minimize gas exchange.

The  $\text{pH}_{\text{NBS}}$  and salinity of seawater samples were measured using a YSI Multilab 4010-2W with IDS 4110-3 pH and IDS 4310 conductivity sensors calibrated with NIST buffers (Fisher Scientific). Total alkalinity was measured using Fisher Scientific Orion Star T910 pH Titrator and HCl titrant (Sigma H1758) standardized against Trizma<sup>®</sup> base (Sigma T6791). Seawater carbonate chemistry parameters were calculated using CO2Sys (Pierrot *et al.*, 2006) as described in Table 1.

### Spawning and crosses

*Crassostrea gigas* from the Broodstock collection and conditioning section were strip-spawned on 19 March 2019 by making small incisions in the gonad with a scalpel blade and washing gametes into a plastic beaker with filtered seawater. Gametes from each parent were kept separate at room temperature for no longer than 1 h before fertilization. Six females and six males were mated using a half-diallel cross to produce 21 pair-mated families (Figure 1). Each family was reared in an individual 250-l conical tanks maintained at 23°C with gently aeration and at a stocking density of  $\sim 10$  larvae  $\text{ml}^{-1}$ . Every 2 days, tanks were drained onto a 40- $\mu\text{m}$  screen to retain larvae, then scrubbed clean with 1% chlorine solution, rinsed, refilled with filtered seawater, and larvae returned to the tank. Larvae were fed daily with mixed live algal diet consisting of *Chaetoceros calcitrans*, *I. galbana*, and *P. lutheri*. Samples of fertilized eggs on day 0 and larvae on day 6 from each family were used for ocean acidification and *Vibrio harveyi* challenge, respectively.

**Table 1.** Seawater chemistry used for ocean acidification assay

| Sample       | Depth (m) | Storage | °C         | pH <sub>NBS</sub> | Salinity (ppt) | Total alkalinity (μmol l) | Ω <sub>aragonite</sub> |
|--------------|-----------|---------|------------|-------------------|----------------|---------------------------|------------------------|
| Field        | 5         |         | 9.3 ± 0.0  | 7.92 ± 0.00       | 28.9 ± 0.2     | 2 003.9 ± 4.3             | 0.9                    |
| Field        | 70        |         | 8.5 ± 0.0  | 7.70 ± 0.01       | 29.4 ± 0.1     | 2 079.3 ± 24.3            | 0.6                    |
| OA challenge | 5         | Sealed  | 23.0 ± 0.0 | 7.94 ± 0.01       | 28.9 ± 0.1     | 2 048.7 ± 8.4             | 1.6                    |
| OA challenge | 70        | Sealed  | 23.0 ± 0.0 | 7.64 ± 0.02       | 29.5 ± 0.1     | 2 071.7 ± 9.0             | 0.9                    |
| OA challenge | 70        | Aerated | 23.0 ± 0.0 | 8.02 ± 0.01       | 33.6 ± 0.1     | 2 307.8 ± 25.1            | 2.3                    |

Seawater was collected from sampling station 17 (BS17) in Baynes Sound, Canada. Seawater samples were immediately spiked with HgCl<sub>2</sub> or kept for OA challenge. The seawater for OA challenge was either stored overnight in sealed amber soda-lime glass bottles or vigorously aerated. Temperature (°C), pH<sub>NBS</sub>, salinity (ppt), and total alkalinity were measured directly and presented as mean ± standard deviation. Aragonite saturation (Ω<sub>aragonite</sub>) was estimated from these parameters using CO2SYS (Pierrot et al., 2006).

**Table 2.** Pearson correlation coefficients (95% CI) between EBVs for larval survival to *Vibrio harveyi* challenge and larval shell length at different aragonite saturation states (Ω<sub>aragonite</sub> = 0.9, 1.6, and 2.3)

|                              | Ω <sub>aragonite</sub> = 0.9 | Ω <sub>aragonite</sub> = 1.6 | Ω <sub>aragonite</sub> = 2.3 | <i>V. harveyi</i>     |
|------------------------------|------------------------------|------------------------------|------------------------------|-----------------------|
| Ω <sub>aragonite</sub> = 0.9 | 1                            | 0.63 (0.09–0.88)             | 0.68 (0.19–0.90)             | –0.48 (–0.83 to 0.13) |
| Ω <sub>aragonite</sub> = 1.6 |                              | 1                            | 0.66 (0.15–0.90)             | –0.41 (–0.80 to 0.22) |
| Ω <sub>aragonite</sub> = 2.3 |                              |                              | 1                            | –0.25 (–0.72 to 0.38) |
| <i>V. harveyi</i>            |                              |                              |                              | 1                     |

|       | ♀(F1) | ♀(F2) | ♀(F3) | ♀(F4) | ♀(F5) | ♀(F6) |
|-------|-------|-------|-------|-------|-------|-------|
| ♂(M1) | X     |       |       |       |       |       |
| ♂(M2) | X     | X     |       |       |       |       |
| ♂(M3) | X     | X     | X     |       |       |       |
| ♂(M4) | X     | X     | X     | X     |       |       |
| ♂(M5) | X     | X     | X     | X     | X     |       |
| ♂(M6) | X     | X     | X     | X     | X     | X     |

**Figure 1.** Representation of the 21 pair-mated families produced as a result of a half-diallel mating design. Source of broodstock. USA Farm 1 = F1, M3, M4. USA Farm 2 = F2, F3, M1, M2. British Columbia = F4, F5, F6, M5. Chile = M6.

### Ocean acidification challenge

Within the first 2 days post-fertilization, *C. gigas* develop from an egg (0% shell) to D-hinge larvae (~80% shell) (Waldbusser et al., 2015). This period is considered the most sensitive life-history stage of bivalves to ocean acidification (Waldbusser et al., 2015; Kapsenberg et al., 2018) with the shell size of D-hinge larvae being appreciably smaller with decreasing aragonite saturation state (Barton et al., 2012; Frieder et al., 2017). We evaluated genetic differences in larval shell size, as a proxy of larval calcification, to ocean acidification by adding 1 ml of fertilized egg suspension from each family (Spawning and crosses section) to duplicate 15-ml falcon tubes with screw cap lids and filling the tube with seawater collected from BS17 with no head space. The final concentration was 50 fertilized eggs ml<sup>-1</sup>. Seawater used was collected from 5 and 70 m. We also included a third treatment of seawater collected from 70 m that was vigorously aerated overnight. Aragonite saturation of each treatment was estimated by collecting triplicate seawater samples prior to ocean acidification

challenge, poisoning with saturated HgCl<sub>2</sub> and measuring temperature, pH, salinity, and total alkalinity as per Seawater collection section. Sealed falcon tubes containing larvae were incubated horizontally in an orbital shaker at 50 rpm and 23°C for 48 h (Eppendorf New Brunswick™ Excella® E-24R). Larvae from each falcon tube were concentrated by centrifugation (1000×g, 5 min), and the supernatant was taken for chemical analysis. Larvae were preserved in 10% neutral buffered formalin. Digital images of 30 larvae from each family per treatment were taken using Zeiss Axio Vert.A1 inverted microscope and Axiocam ERc 5s camera to determine shell length (longest axis perpendicular to the hinge) of normally developed larvae only. Normally developed larvae were characterized by a straight hinge, smooth curvature along the edge of the valve, and the appearance of tissue within the translucent shell (Waldbusser et al., 2015). Images were analysed using Zeiss Zen Pro digital imaging software.

### Disease challenge

The *V. harveyi* (strain 2018-BS-005) used in the disease challenge is a pathogenic strain isolated from a mass mortality event of juvenile and adult *C. gigas* in Baynes Sound, Canada, during the summer of 2018. *Vibrio harveyi* was grown overnight in tryptone soy broth containing 2% NaCl at 23°C under constant agitation at 200 rpm. The culture was centrifuged (1000×g, 15 min), and cell pellet was washed and resuspended in sterile seawater. The titre of *V. harveyi* inoculum was estimated by serial dilution and plating on tryptone soy agar + 2% NaCl. Colonies were enumerated after incubation at 23°C for 48 h.

Larvae from each family (6 days post-fertilization) were dispensed at 150 larvae well<sup>-1</sup> into 12-well tissue culture plates and resuspended to the final volume of 3 ml well<sup>-1</sup>. A 50-μl aliquot of *V. harveyi* suspension (10<sup>7</sup> *V. harveyi* cells per well) or sterile seawater (negative control) was added to each well. Larvae were fed with 10<sup>6</sup> cells of *C. calcitrans*. Triplicate challenge and control wells were prepared for each family. Plates were incubated at 23°C, and live/dead counts of larvae were performed using a compound light microscope and Sedgewick-Rafter counting

chamber at 4 days post-inoculation according to the criteria outlined in Richards *et al.* (2015). Dead larvae were easily recognized by the lack of movement in their velar cilia and bleached appearance compared with the darker brown of viable larvae.

### Heritability

Genetic parameters were estimated using MCMCglmm package in R (Hadfield, 2010), which allows the fitting of variance structures associated with pedigrees under an animal model. Animal models are a form of mixed-effect model used to segregate environmental and genetic effects on an animal phenotype and are especially powerful because they can be used in the absence of a fully crossed breeding design (Wilson *et al.*, 2010). Larval size to ocean acidification challenges (continuous data) and survival to *V. harveyi* challenge (binary data) was fitted to the mixed-effects linear model:

$$y = \mu + \text{Animal} + \text{Dam} + e,$$

where  $\mu$  is the population mean, Animal is a random effect due to the additive effects of an individual's genetic makeup (additive genetic variance), Dam is a random effect due to the mothers' contribution to offspring phenotype including not only nuclear genes but also all the component within an egg (maternal transcript, organelles, and nutrients), and  $e$  is the random residual error. Incorporating maternal effects improved the accuracy of the model. Models were run with 1 500 000 iterations, with a burn-in of 500 000 iterations, and a thinning rate of 500. Estimates of additive genetic and residual variance were calculated from the modes of the posterior distribution, and a Bayesian equivalent of 95% confidence intervals (CI) was obtained by calculating the values of estimate that bound 95% of the posterior distributions. Narrow-sense heritability, or the proportion of total phenotypic variation that is additive genetic in origin, was estimated under the animal model described above as

$$h^2 = V_a / (V_a + V_m + V_e),$$

where  $V_a$ ,  $V_m$ , and  $V_e$  are the variances attributed to additive genetic, maternal, and residual error effects, respectively. The breeding value for each individual broodstock was extracted from the animal model, and linear regression was used to determine genetic correlations between traits.

## Results

### Seawater profile

Table 1 provides the temperature, salinity, pH, total alkalinity, and aragonite saturation state of seawater samples collected from 5 and 70 m. Physiochemical changes from vigorously aerating 70 m seawater sample are also presented in Table 1. Aragonite saturation for seawater samples at 70, 5, and 70 m + aeration was estimated to be 0.9, 1.6, and 2.3, respectively.

### Ocean acidification challenge

Aragonite saturation level of natural seawater samples had a significant effect on shell length of D-hinge larvae at 48 h post-fertilization ( $p < 0.05$ ) with the larval length (mean  $\pm$  standard deviation) of  $67.2 \pm 4.4$ ,  $72.3 \pm 4.2$ , and  $73.2 \pm 5.1$  at seawater aragonite saturation states of 0.9, 1.6, and 2.3, respectively. There was also a significant family-by-environment interaction

on shell length ( $p < 0.05$ ) with families 01 and 04 not developing to D-hinge larvae under conditions of aragonite undersaturation ( $\Omega_{\text{aragonite}} = 0.9$ ), whereas the shell length of four families (13, 19, 20, and 21) was not affected by aragonite saturation ( $p > 0.05$ ). The remaining families had smaller shell lengths when aragonite was undersaturated ( $p < 0.05$ , Figure 2).

Narrow-sense heritability for larval shell size at 48 h post-fertilization was 0.151 (CI 0.138–0.171), 0.144 (CI 0.130–0.161), and 0.095 (CI 0.085–0.106) for seawater aragonite saturation states 0.9, 1.6, and 2.3, respectively. Maternal effects ( $m^2$ ) accounted for 14.1% (CI 12.8–15.3%), 13.3% (CI 12.0–14.3%), and 9.1% (CI 8.1–9.9%) of larval shell size at aragonite saturation states of 0.9, 1.6, and 2.3, respectively. A correlation of estimated breeding values (EBVs) revealed that parents whose offspring were larger in normal conditions ( $\Omega_{\text{aragonite}} = 1.6$ ) tended to be larger in aragonite undersaturated conditions ( $\Omega_{\text{aragonite}} = 0.9$ ) [Table 2 Pearson correlation,  $r = 0.63$  (95% CI 0.09–0.88),  $p < 0.05$ ].

### Vibrio harveyi challenge

The survival of *C. gigas* families to experimental infection with *V. harveyi* ( $20 \times 10^8$  CFU/ml) ranged from 0 to 100% (Figure 3c, average survival = 48.1%). The narrow-sense heritability of this trait (survival: live/dead) was found to be moderate ( $h^2 = 0.253$ , CI 0.232–0.266). Maternal effects also accounted for 25.2% (CI 23.5 and 26.8%) of the difference in survival between the families.

### Genetic correlation between larval shell size and Vibrio survival

EBVs did not correlate between larval shell size in aragonite undersaturated conditions ( $\Omega_{\text{aragonite}} = 0.9$ ) and survival to *V.*

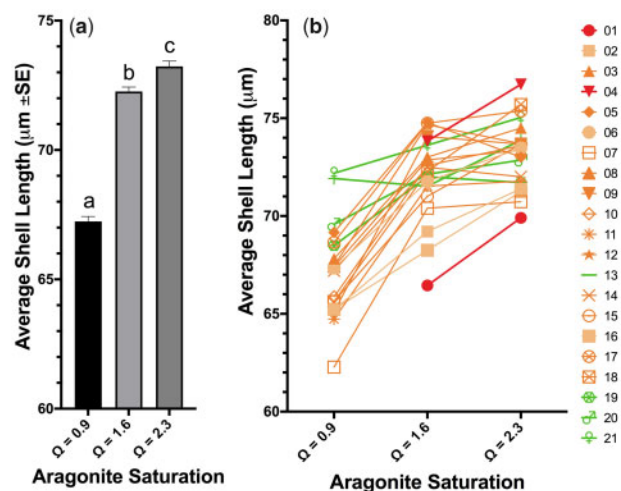

**Figure 2.** Average shell length of *Crassostrea gigas* larvae at 2 days post-fertilization. (a) Average shell length ( $\mu\text{m} \pm \text{SE}$ ) of *C. gigas* population in seawater with estimated aragonite saturation state of 0.9, 1.6, and 2.3. Different letters indicate significant differences between treatments ( $p < 0.05$ ). (b) Genotype reaction norms for average shell length at each aragonite saturation state. Green line represents four families whose shell length was not affected by aragonite saturation state ( $p > 0.05$ ), whereas red line represents two families that failed to develop to D-hinge larvae in aragonite undersaturated conditions.



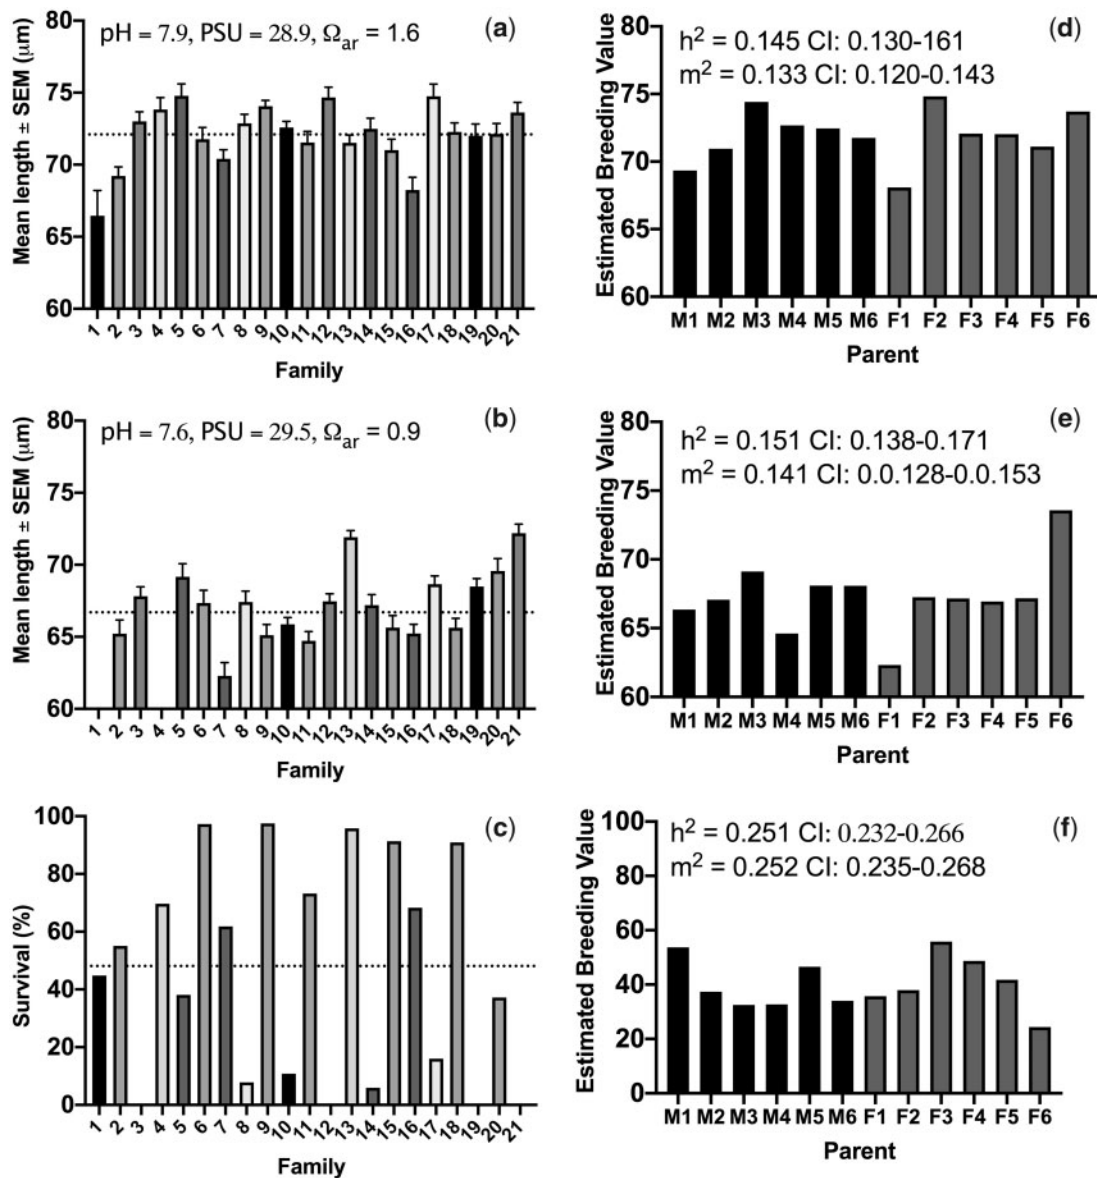

**Figure 3.** Phenotypic differences for average shell length and survival of *Crassostrea gigas* larvae. Average shell length ( $\mu\text{m} \pm \text{SE}$ ) for each family at (a) aragonite undersaturated ( $\Omega_{\text{aragonite}} = 0.9$ ) and (b) over-saturated conditions ( $\Omega_{\text{aragonite}} = 1.6$ ) at 2 days post-fertilization, respectively. (c) Average survival for each family exposed to *Vibrio harveyi* at 4 days post-inoculation. The EBVs for each sire (M1–M6) and dam (F1–F6) for larval size at aragonite undersaturated (d), normal conditions (e), and larval survival to *V. harveyi* (f). Heritability and maternal effects were estimated using MCMCglmm package in R (Hadfield, 2010).  $h^2$ , narrow-sense heritability,  $m^2$ , maternal effects.

*harveyi* (Figure 4, linear regression,  $r^2 = 0.24$ ,  $F_{1,10} = 3.052$ ,  $p > 0.05$ ).

## Discussion

The main findings of this study indicate that additive genetic variation explains a low, but nonzero, proportion of the total phenotypic variation in larval shell length of *C. gigas* grown in aragonite undersaturated conditions, and genetic selection of *C. gigas* for increase resistance to *V. harveyi* is unlikely to impact larval sensitivity to ocean acidification. Finally, our data provide compelling evidence that aquaculture hatchery production and domestication may have inadvertently produced populations of *C. gigas* that are less sensitive to ocean acidification. These data are very

valuable to the aquaculture industry; *C. gigas* is one of the most important aquaculture species in Northern America (Dumbauld et al., 2009), but summertime aragonite thresholds in the coastal waters of the NE Pacific Ocean are projected, within a few decades, to decline to a level that induces abnormal larval development and survival in *C. gigas* (Evans et al., 2019).

Our research builds upon previous studies investigating adaptation of oysters to ocean acidification and disease (Parker et al., 2009; Waldbusser et al., 2015; Gonçalves et al., 2017; Stapp et al., 2018). Genetic selection over multiple generations in aquaculture hatcheries for improved growth rate and adult survival has resulted in oyster populations that are less sensitive to aragonite undersaturated conditions compared to non-selected or wild

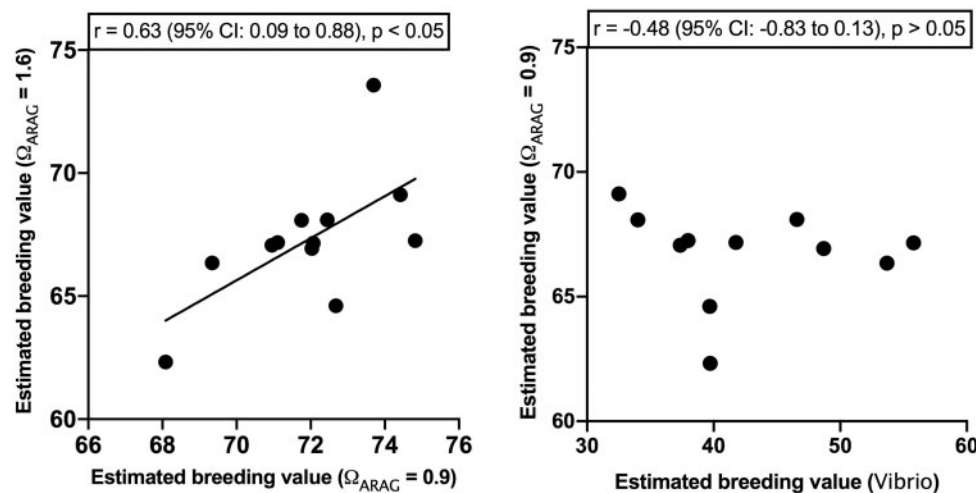

**Figure 4.** Pearson correlation of EBVs for *Crassostrea gigas* parents. (a) EBVs for larval size at aragonite undersaturated and normal conditions. (b) EBVs for larval size at aragonite undersaturated conditions and survival to *Vibrio harveyi*.

populations (Parker *et al.*, 2011; Durland *et al.*, 2019). Despite comprehensive genetic and physiological characterization of domesticated oysters to corrosive seawater (Goncalves *et al.*, 2017; Stapp *et al.*, 2018; Durland *et al.*, 2019; Fitzer *et al.*, 2019), it is poorly understood why these domesticated populations are more resilient to ocean acidification. A standard aquaculture practice is to cull slow-growing larvae in the hatchery to synchronize and reduce the time taken for larvae to metamorphose to spat (Taris *et al.*, 2006, 2007), and we consider that this size-related selective pressure may have inadvertently produced domesticated oyster populations with increase resilience to ocean acidification. In our experiment, oyster broodstock that produce larger D-hinge larvae in normal conditions have a tendency to also produce larvae with greater resilience to ocean acidification (Figure 4a).

Commercial aquaculture hatcheries in the NE Pacific have installed chemical buffering systems to dose sodium carbonate for repairing the aragonite saturation state of seawater (Barton *et al.*, 2015). Our data indicate that vigorous aeration of seawater for  $\sim 12$  h can also repair the aragonite saturation state of seawater and increase the mean shell length of D-hinge larvae at 48 h post-fertilization from  $67.2 \pm 4.4 \mu\text{m}$  ( $\Omega_{\text{aragonite}} = 0.9$ ) to  $73.2 \pm 5.1 \mu\text{m}$  ( $\Omega_{\text{aragonite}} = 2.3$ ). In the genetic population of oysters we sampled as broodstock, we observed no correlation in the EBVs for resilience to ocean acidification and survival to *V. harveyi*, indicating that selection for one of these traits is unlikely to influence the other (Figure 4). However, we still recommend the breeding objectives for the oyster industry to be focused on disease resistance and use an engineering solution in the hatchery, such as vigorous aeration or pH buffering using sodium carbonate (Barton *et al.*, 2015), to repair aragonite saturation of seawater. The low heritability for larval shell length in aragonite undersaturated conditions means the response to selection, or improvement each generation, would be close to negligible.

Naturalized populations of *C. gigas* also have an important social and ecological role (Katsanevakis *et al.*, 2014), protecting the tidal flat against storm erosion (Wallis *et al.*, 2015), increasing the biodiversity and abundance of macroinvertebrates (Markert *et al.*, 2010), and providing important feeding areas for fishes and shorebirds (Herbert *et al.*, 2018). These ecosystems or oyster reefs

are also potentially threatened by ocean change (Parker *et al.*, 2013). The measures of heritability and genetic correlations between ocean acidification and disease tolerance are the important first step in evaluating whether natural populations of *C. gigas* have the potential to evolve, but the ability of natural *C. gigas* populations to adapt to ocean change also depends on the selective pressure applied during larval development, which is a complex and nonlinear process (Chevin *et al.*, 2010). For example, periods of carbonate corrosive conditions in coastal waters of western Canada are variable throughout the year and may not coincide with *C. gigas* spawning and stages of early larval development (Evans *et al.*, 2019). Efforts to model population growth rates for *C. gigas* by combining evolutionary genetics with climatic projections, such as a mechanistic population model (Burger and Lynch, 1995), are now warranted. Such information will be critical for understanding if *C. gigas* possess the capacity to adapt to the current pace of ocean change.

## Funding

The authors acknowledge funding provided to T. Green from Canada Research Chair Program (950-231856) and Natural Sciences and Engineering Research Council of Canada (NSERC) Discovery Grant (RGPIN-2018-06761).

## Acknowledgements

The authors are grateful of the assistance provided by the team at VIU's Deep Bay Marine Field Station: Carl Butterworth, Rachel Cowling, Sarah Leduc, Shannon Schmunk, and Julie Vandenbor.

## References

- Azema, P., Lamy, J.-B., Boudry, P., Renault, T., Travers, M.-A., and Degremont, L. 2017. Genetic parameters of resistance to *Vibrio aestuarianus*, and OsHV-1 infections in the Pacific oyster, *Crassostrea gigas*, at three different life stages. *Genetics Selection Evolution*, 49: 23.
- Baker-Austin, C., Trinanes, J., Gonzalez-Escalona, N., and Martinez-Urtaza, J. 2017. Non-cholera vibrios: the microbial barometer of climate change. *Trends in Microbiology*, 25: 76–84.
- Barton, A., Hales, B., Waldbusser, G. G., Langdon, C., and Feely, R. A. 2012. The Pacific oyster, *Crassostrea gigas*, shows negative

- correlation to naturally elevated carbon dioxide levels: implications for near-term ocean acidification effects. *Limnology and Oceanography*, 57: 698–710.
- Barton, A., Waldbusser, G. G., Feely, R. A., Weisberg, S. B., Newton, J. A., Hales, B., Cudd, S., *et al.* 2015. Impacts of coastal acidification on the Pacific Northwest shellfish industry and adaption strategies implemented in response. *Oceanography*, 25: 146–159.
- Burge, C. A., Eakin, M. C., Friedman, C. S., Froelich, B., Hershberger, P. K., Hofmann, E. E., Petes, L. E., *et al.* 2014. Climate change influences on marine infectious diseases: implication for management and society. *Annual Review of Marine Science*, 6: 249–277.
- Burger, R., and Lynch, M. 1995. Evolution and extinction in a changing environment: a quantitative-genetic analysis. *Evolution*, 49: 151–163.
- Chevin, L.-M., Lande, R., and Mace, G. M. 2010. Adaptation, plasticity, and extinction in a changing environment: towards a predictive theory. *PLoS Biology*, 8: e1000357.
- Cole, V. J., Parker, L. M., O'Connor, S. J., O'Connor, W. A., Scanes, E., Byrne, M., and Ross, P. M. 2016. Effects of multiple climate change stressors: ocean acidification interacts with warming, hyposalinity, and low food supply on the larvae of the brooding flat oyster *Ostrea angasi*. *Marine Biology*, 163: 125.
- Dumbauld, B. R., Ruesink, J. L., and Rumrill, S. S. 2009. The ecological role of bivalve shellfish aquaculture in the estuarine environment: a review with application to oyster and clam culture in West Coast (USA) estuaries. *Aquaculture*, 290: 196–223.
- Durland, E., Waldbusser, G., and Langdon, C. 2019. Comparison of larval development in domesticated and naturalized stocks of the Pacific oyster *Crassostrea gigas* exposed to high pCO<sub>2</sub> conditions. *Marine Ecology Progress Series*, 621: 107–125.
- Elston, R. A., Hasegawa, H., Humphrey, K. L., Polyak, I. K., and Hase, C. C. 2008. Re-emergence of *Vibrio tubiashii* in bivalve shellfish aquaculture: severity, environmental drivers, geographic extent and management. *Diseases of Aquatic Organisms*, 82: 119–134.
- Estes, R. M., Friedman, C. S., Elston, R. A., and Herwig, R. P. 2004. Pathogenicity testing of shellfish hatchery bacterial isolates on Pacific oyster *Crassostrea gigas* larvae. *Diseases of Aquatic Organisms*, 58: 223–230.
- Evans, W., Pocock, K., Hare, A., Weekes, C., Hales, B., Jackson, J., Gurney-Smith, H., *et al.* 2019. Marine CO<sub>2</sub> patterns in the Northern Salish Sea. *Frontiers in Marine Science*, 5: 536.
- Feely, R. A., Sabine, C. L., Lee, K., Berelson, W., Kleypas, J., Fabry, V. J., and Millero, F. J. 2004. Impact of anthropogenic CO<sub>2</sub> on the CaCO<sub>3</sub> system in the oceans. *Science*, 305: 362–366.
- Fitzer, S. C., McGill, R. A. R., Torres Gabarda, S., Hughes, B., Dove, M., O'Connor, W., and Byrne, M. 2019. Selectively bred oysters can alter their biomineralization pathways, promoting resilience to environmental acidification. *Global Change Biology*, 25: 4105–4115.
- Foo, S. A., Dworjanyn, S. A., Poore, A. G. B., and Byrne, M. 2012. Adaptive capacity of the habitat modifying sea urchin *Centrostephanus rodgersii* to ocean warming and ocean acidification: performance of early embryos. *PLoS One*, 7: e42497.
- Frieder, C. A., Applebaum, S. L., Francis Pan, T.-C., Hedgecock, D., and Manahan, D. T. 2017. Metabolic cost of calcification in bivalve larvae under experimental ocean acidification. *ICES Journal of Marine Science*, 74: 941–954.
- Goncalves, P., Thompson, E. L., and Raftos, D. A. 2017. Contrasting impacts of ocean acidification and warming on the molecular responses of CO<sub>2</sub>-resilient oysters. *BMC Genomics*, 18: 431.
- Hadfield, J. 2010. MCMC methods for multi-response generalized linear mixed models: the MCMCglmm R package. *Journal of Statistical Software*, 33: 1–22.
- Herbert, R. J. H., Davies, C. J., Bowgen, K. M., Hatton, J., and Stillman, R. A. 2018. The importance of nonnative Pacific oyster reefs as supplementary feeding areas for coastal birds on estuary mudflats. *Aquatic Conservation*, 28: 1294–1307.
- Kapsenberg, L., Miglioli, A., Bitter, M. C., Tambutte, E., Dumollard, R., and Gattuso, J.-P. 2018. Ocean pH fluctuations affect mussel larvae at key developmental transitions. *Proceedings of the Royal Society B*, 285: 20182381.
- Katsanevakis, S., Wallentinus, I., Zenetos, A., Leppakoski, E., Cinar, M. E., Ozturk, B., Grabowski, M., *et al.* 2014. Impacts of invasive alien marine species on ecosystem services and biodiversity: a pan-European review. *Aquatic Invasions*, 9: 391–423.
- Kelly, M. W., and Hofmann, G. E. 2013. Adaptation and the physiology of ocean acidification. *Functional Ecology*, 27: 980–990.
- Kelly, M. W., Padilla-Gamino, J. L., and Hofmann, G. E. 2013. Natural variation and the capacity to adapt to ocean acidification in the keystone sea urchin *Strongylocentrotus purpuratus*. *Global Change Biology*, 19: 2536–2546.
- Kruuk, L. E. B. 2004. Estimating genetic parameters in natural populations using the 'animal model'. *Philosophical Transactions of the Royal Society B*, 359: 873–890.
- Le Roux, F., Wegner, M. K., and Polz, M. F. 2016. Oysters and vibrios as a model for disease dynamics in wild animals. *Trends in Microbiology*, 24: 568–580.
- Liang, B., Jiang, F., Zhang, S., Yue, X., Wang, H., and Liu, B. 2017. Genetic variation in *Vibrio* resistance in the clam *Meretrix petechialis* under the challenge of *Vibrio parahaemolyticus*. *Aquaculture*, 468: 458–463.
- Malvezzi, A. J., Murray, C. S., Feldheim, K. A., Dibattista, J. D., Garant, D., Gobler, C. J., Chapman, D. D., *et al.* 2015. A quantitative genetic approach to assess the evolutionary potential of a coastal marine fish to ocean acidification. *Evolutionary Applications*, 8: 352–362.
- Markert, A., Wehrmann, A., and Kroncke, I. 2010. Recently established *Crassostrea*-reefs versus native *Mytilus*-beds: differences in ecosystem engineering affects the macrofaunal communities (Wadden Sea of Lower Saxony, southern German Bight). *Biological Invasions*, 12: 15–32.
- Morrissey, M. B., Kruuk, L. E. B., and Wilson, A. J. 2010. The danger of applying the breeder's equation in observational studies of natural populations. *Journal of Evolutionary Biology*, 23: 2277–2288.
- Munday, P. L., Warner, R. R., Monro, K., Pandolfi, J. M., and Marshall, D. J. 2013. Predicting evolutionary responses to climate change in the sea. *Ecology Letters*, 16: 1488–1500.
- Orr, J. C., Fabry, V. J., Aumont, O., Bopp, L., Doney, S. C., Feely, R. A., Gnanadesikan, A., *et al.* 2005. Anthropogenic ocean acidification over the twenty-first century and its impact on calcifying organisms. *Nature*, 437: 681–686.
- Parker, L. M., Ross, P. M., and O'Connor, W. A. 2009. The effect of ocean acidification and temperature on the fertilization and embryonic development of the Sydney rock oyster *Saccostrea glomerata* (Gould 1850). *Global Change Biology*, 15: 2123–2136.
- Parker, L. M., Ross, P. M., and O'Connor, W. A. 2011. Populations of the Sydney rock oyster, *Saccostrea glomerata*, vary in response to ocean acidification. *Marine Biology*, 158: 689–697.
- Parker, L. M., Ross, P. M., O'Connor, W. A., Borysko, L., Raftos, D. A., and Pörtner, H.-O. 2012. Adult exposure influences offspring response to ocean acidification in oysters. *Global Change Biology*, 18: 82–92.
- Parker, L. M., Ross, P. M., O'Connor, W. A., Pörtner, H.-O., Scanes, E., and Wright, J. M. 2013. Predicting the response of molluscs to the impact of ocean acidification. *Biology*, 2: 651–692.
- Pierrot, D., Lewis, E., and Wallace, D. W. R. 2006. MS Excel Program Developed for CO<sub>2</sub> System Calculations. CDIA-105a. Carbon Dioxide Information Analysis Center, Oak Ridge National Laboratory, U.S. Department of Energy, Oak Ridge, Tennessee.
- Reum, J. C. P., Alin, S. R., Harvey, C. J., Bednarsek, N., Evans, W., Feely, R. A., Hales, B., *et al.* 2016. Interpretation and design of ocean acidification experiments in upwelling systems in the

- context of carbonate chemistry co-variation with temperature and oxygen. *ICES Journal of Marine Science*, 73: 582–595.
- Richards, G. P., Watson, M. A., Needleman, D. S., Church, K. M., and Hase, C. C. 2015. Mortalities of Eastern and Pacific oyster larvae caused by the pathogens *Vibrio coralliilyticus* and *Vibrio tubiashii*. *Applied and Environmental Microbiology*, 81: 292–297.
- Ross, P. M., Parker, L., and Byrne, M. 2016. Transgenerational responses of molluscs and echinoderms to changing ocean conditions. *ICES Journal of Marine Science*, 73: 537–549.
- Stapp, L. S., Parker, L. M., O'Connor, W. A., Bock, C., Ross, P. M., Pörtner, H. O., and Lannig, G. 2018. Sensitivity to ocean acidification differs between populations of the Sydney rock oyster: role of filtration and ion-regulatory capacities. *Marine Environmental Research*, 135: 103–113.
- Sunday, J. M., Calosi, P., Dupont, S., Munday, P. L., Stillman, J. H., and Reusch, T. B. H. 2014. Evolution in an acidifying ocean. *Trends in Ecology & Evolution*, 29: 117–125.
- Sunday, J. M., Cri, R. N., Harley, C. D. G., and Hart, M. W. 2011. Quantifying rates of evolutionary adaption in response to ocean acidification. *PLoS One*, 6: e22881.
- Taris, N., Batista, F. M., and Boudry, P. 2007. Evidence of response to unintentional selection for faster development and inbreeding depression in *Crassostrea gigas* larvae. *Aquaculture*, 272: S69–S79.
- Taris, N., Ernande, B., McCombie, H., and Boudry, P. 2006. Phenotypic and genetic consequences of size selection at the larval stage in the Pacific oyster (*Crassostrea gigas*). *Journal of Experimental Marine Biology and Ecology*, 333: 147–158.
- Tasoff, A. J., and Johnson, D. W. 2019. Can larvae of a marine fish adapt to ocean acidification? Evaluating the evolutionary potential of California grunion (*Leuresthes tenuis*). *Evolutionary Applications*, 12: 560–571.
- Vezzulli, L., Grande, C., Reid, P. C., Hélaouët, P., Edwards, M., Höfle, M. G., Brettar, I., *et al.* 2016. Climate influence on *Vibrio* and associated human diseases during the past half-century in the coastal North Atlantic. *Proceedings of the National Academy of Sciences of the United States of America*, 113: E5062–E5071.
- Waldbusser, G. G., Hales, B., Langdon, C. J., Haley, B. A., Schrader, P., Brunner, E. L., Gray, M. W., *et al.* 2015. Saturation-state sensitivity of marine bivalve larvae to ocean acidification. *Nature Climate Change*, 5: 273–280.
- Wallis, B., De Paiva, J.-S., Van Prooijen, B. C., Ysebaert, T., and Smaal, A. C. 2015. The ecosystem engineer *Crassostrea gigas* affects tidal flat morphology beyond the boundary of their reef structures. *Estuaries and Coasts*, 38: 941–950.
- Welch, M. J., and Munday, P. L. 2017. Heritability of behavioural tolerance to high CO<sub>2</sub> in a coral reef fish is masked by nonadaptive phenotypic plasticity. *Evolutionary Applications*, 10: 682–693.
- Wilson, A. J., Reale, D., Clements, M. N., Morrissey, M. M., Postma, E., Walling, C. A., Kruuk, L. E. B., *et al.* 2010. An ecologist's guide to the animal model. *Journal of Animal Ecology*, 79: 13–26.

Handling editor: Fabrice Pernet
